# Supplementary material
Source: ML conference proceedings conference paper supplement (https://proceedings.mlr.press/v80/sharchilev18a.html)
Supplement: Supplementary file 1 [file sharchilev18a-supp.pdf]

---

## Supplementary 1: Dataset Statistics and CatBoost Parameters

In this supplementary material, we specify the main statistics of the evaluation datasets (Table 1) and values of CatBoost parameters used in the experiments (Table 2):

Table 1: Dataset statistics.

| Dataset   | No. Features | Train size | Test size |
|-----------|--------------|------------|-----------|
| Adult     | 14           | 32,561     | 16,281    |
| Amazon    | 9            | 26,215     | 6,554     |
| Upselling | 214          | 35,000     | 15,000    |
| Hospital  | 127          | 20,000     | 81,766    |

Table 2: Dataset CatBoost parameters.

| Dataset   | No. Trees | Depth | Learn rate | Formula |
|-----------|-----------|-------|------------|---------|
| Adult     | 100       | 6     | 0.2        | Newton  |
| Amazon    | 100       | 6     | 0.15       | Newton  |
| Upselling | 100       | 6     | 0.15       | Newton  |
